# Supplementary material
Source: PubMed Central journal article supplement (PMC1783985)
Supplement: bj4020081add.pdf [file bj4020081add.pdf]

| <b>Oligonucleotides for RT-PCR</b>                    |             |                                         |                       |                       |  |
|-------------------------------------------------------|-------------|-----------------------------------------|-----------------------|-----------------------|--|
| Gene                                                  | Orientation | Sequence of primers (5'→3')             | T <sup>o</sup> m (°C) | PCR product size (bp) |  |
| MUC4                                                  | Sense       | CGCGGTGGTGGAGGCGTTCTT                   | 60                    | 596                   |  |
|                                                       | Antisense   | GAAGAATCCTGACAGCCTTCA                   |                       |                       |  |
| HNF1 $\alpha/\beta$                                   | Sense       | TAGTGGAGGAGTGCAACAGGGC                  | 63                    | 702/636               |  |
|                                                       | Antisense   | TGGGAGAACTGGACGGGCTG                    |                       |                       |  |
| HNF4 $\alpha$                                         | Sense       | CGTGTGACCTGCACCCTCACCTGATG              | 64                    | 370                   |  |
|                                                       | Antisense   | GTCGGATCCCCAGCGGCTTGTAGAT               |                       |                       |  |
| 18S                                                   | Sense       | GGACCAGAGGCAAAGCATTGGCC                 | 64                    | 496                   |  |
|                                                       | Antisense   | TCAATCTCGGGTGGCTGAACGC                  |                       |                       |  |
| $\beta$ -actin                                        | Sense       | TGACGGGGTCACCCACACTGTGCCATCTA           | 71                    | 661                   |  |
|                                                       | Antisense   | CTAGAAGCATTGCGGTGGACGATGGAGGG           |                       |                       |  |
| GAPDH                                                 | Sense       | TGAAGGTCGGAGTCAACGGATTTGGT              | 60                    | 980                   |  |
|                                                       | Antisense   | CATGTGGGCCATGAGGTCCACCAC                |                       |                       |  |
| <b>Oligonucleotides for site-directed mutagenesis</b> |             | <b>Sequence (5'→3')</b>                 | <b>Orientation</b>    |                       |  |
| Mutated T106                                          |             | GGTAAATCAGACTTGGTACACATCCAGCTTCCTGCTCG  | Sense                 |                       |  |
|                                                       |             | CGAGCAGGAAGCTGGATGTGTACCAAGTCTGATTTACC  | Antisense             |                       |  |
| Mutated T144                                          |             | CCTGCCTCCCGTGGTGGATTGACTTACACCTGAC      | Sense                 |                       |  |
|                                                       |             | GTCAGGTGTAAGTCAATCCACCACGGGAGGCAGG      | Antisense             |                       |  |
| <b>Oligonucleotides for EMSA</b>                      |             | <b>Sequence (5'→3')</b>                 |                       |                       |  |
| Wild-type T91                                         |             | GCAGCGCTTTGTA <del>CTT</del> CA         |                       |                       |  |
| Wild-type T144                                        |             | CTCCCGTGGAAATATTA <del>ACTT</del> TACAC |                       |                       |  |
| Mutated T144                                          |             | CTCCCGTGGAGGACCA <del>ACTT</del> TACAC  |                       |                       |  |
| Wild type T106                                        |             | ATCAGACTTAA <del>TAAA</del> CATCCAGCT   |                       |                       |  |
| Mutated T106                                          |             | ATCAGACTACTGAGACATCCAGCT                |                       |                       |  |
| <b>Oligonucleotides for ChIP analysis</b>             |             |                                         |                       |                       |  |
| Promoter region                                       | Orientation | Sequence of primers (5'→3')             | T <sup>o</sup> m (°C) | PCR product size (bp) |  |
| -3078/-2893 (T144)                                    | Sense       | TTACACCCACATCCACA                       | 50                    | 186                   |  |
|                                                       | Antisense   | ATCCGATGGGGACAGAAT                      |                       |                       |  |
| -3515/-3273 (T106)                                    | Sense       | GGGATGATGAAGCTCCTG                      | 50                    | 243                   |  |
|                                                       | Antisense   | TTCAATCTTGTCAGACTTAGG                   |                       |                       |  |

Supplemental Table I: Sequences of the oligonucleotides used for RT-PCR, site-directed mutagenesis, EMSA and ChIP studies. Binding sites are italicised. Mutated nucleotides are underlined.
